# Supplementary material for: Semaphorin 4D is upregulated in neurons of diseased brains and triggers astrocyte reactivity
Source: Springer Nature journal article supplement (doi:10.1186/s12974-022-02509-8), 2022-08-06
Supplement: MOESM1 [file 23342940]

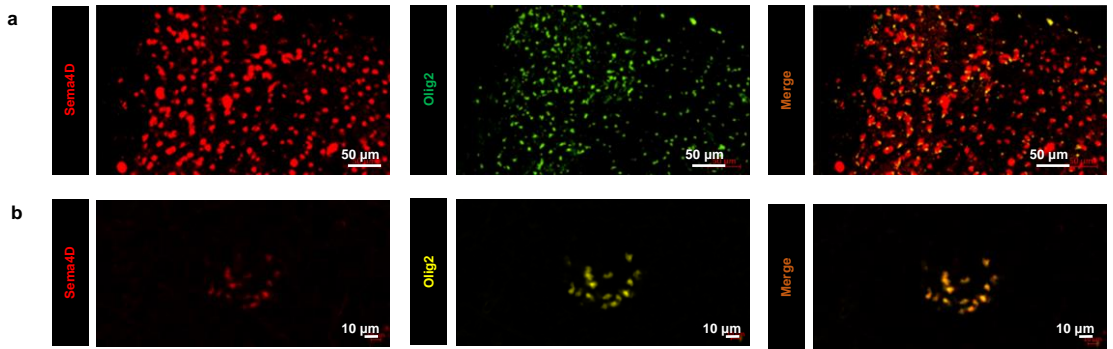

**Additional file 1. Fig. S1: SEMA4D is expressed on Olig2-positive oligodendrocytes of dentate gyrus regions in HD mice at 9.3 months of age. A.** Plan-Apochromat 40x/0.95 objective SEMA4D is expressed on both oligodendrocytes (SEMA4D+Oligo2+, yellow) and the closely associated neurons (SEMA4D+ but Olig2-, red. See also Fig. 1). **B.** Higher magnification images of SEMA4D+ oligodendrocytes: Plan-Apochromat 63x/1.4, oil objective and ApoTome system (Carl Zeiss) with AxioCam 702 Monochrome Camera.
