# Supplementary material for: Semaphorin 4D is upregulated in neurons of diseased brains and triggers astrocyte reactivity
Source: Springer Nature journal article supplement (doi:10.1186/s12974-022-02509-8), 2022-08-06
Supplement: MOESM2 [file 23342940]

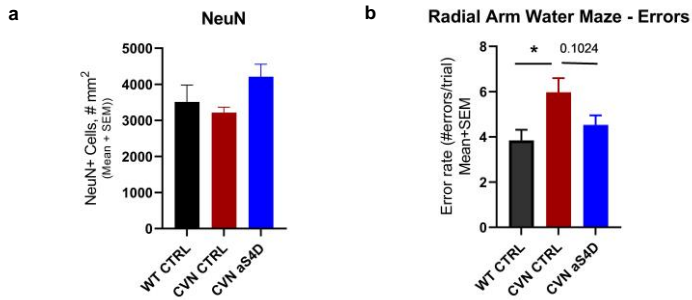

**Additional file 2. Fig. S2:** CVN and WT mice were treated *in vivo* with mouse anti-SEMA4D “aS4D” or mouse isotype-matched control antibody “CTRL” Brains were collected at week 41. **a.** Hippocampal region CA1-3 including stratum oriens, radiatum and pyramidal layer of CVN and wild type mice were stained for NeuN. Differences between groups were not statistically significant, as determined by 2-way ANOVA with Bonferroni’s adjustment. **b.** Error rate in Radial Arm Water Maze at week 36, group mean of all animals+SEM is shown. Statistical significance was determined by unpaired t-test, p-value is indicated; \* p<0.05.
