# Supplementary material for: Semaphorin 4D is upregulated in neurons of diseased brains and triggers astrocyte reactivity
Source: Springer Nature journal article supplement (doi:10.1186/s12974-022-02509-8), 2022-08-06
Supplement: MOESM4 [file 23342940]

a

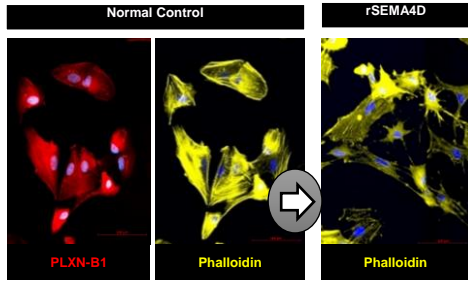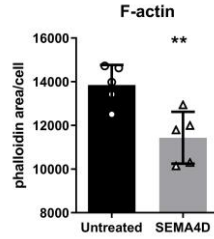

b

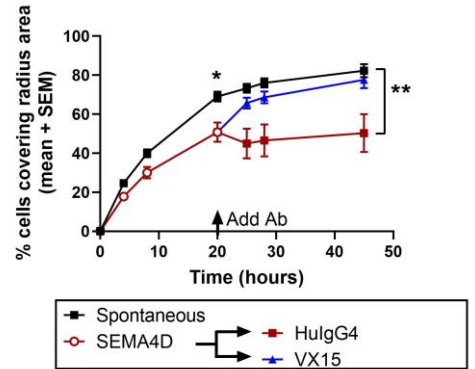

**Additional file 4. Fig.S4: a.** Primary rat astrocyte cultures were stained for expression of receptor PLXN-B1 (red), F-actin filaments (phalloidin, yellow) and nuclei (DAPI, blue) before (center) and after (right) one-hour treatment with recombinant SEMA4D. Representative images are shown. Mean phalloidin-positive area/cell in a field of ~ 300 GFAP+ astrocytes was quantified using ImagePro software in each of five separate culture wells/condition. **b.** SEMA4D inhibits process extension of astrocytes; pepinemab reverses effects. Astrocyte process extension into cell-free area was determined following culture of purified rat astrocytes for the indicated time in the presence or absence of recombinant SEMA4D (15 mcg/ml), added at time 0. SEMA4D antibody “VX15” or isotype control antibody “HulG4” (50 ug/ml) was added at time = 20 hours to determine whether the effect is reversible. Results in replicate wells (n=6) at each time point are normalized to cell-free area at time 0. Statistical significance was determined using two-way ANOVA
